# Supplementary material for: Viral N6-methyladenosine upregulates replication and pathogenesis of human respiratory syncytial virus
Source: PubMed Central journal article supplement (PMC6785563; doi:10.1038/s41467-019-12504-y), 2019-10-09
Supplement: 41467_2019_12504_MOESM3_ESM.pdf [file 41467_2019_12504_MOESM3_ESM.pdf]

## Description of Additional Supplementary Files

File Name: Supplementary Data 1

Description: Differentially m<sup>6</sup>A methylated peaks in HeLa cells after RSV infection. A total of 2256 differentially m<sup>6</sup>A methylated peaks are identified using count based QNB test

File Name: Supplementary Data 2

Description: Differentially expressed genes in HeLa cells after RSV infection. Over nine thousands differentially expressed genes are identified by analysis of RNA-seq data of host cell (HeLa) at adjusted P value cutoff of 0.05.

File Name: Supplementary Data 3

Description: Differentially expressed genes in A549 cells after RSV infection. Over seven thousands differentially expressed genes are identified by analysis of RNA-seq data of host cell (A549) at adjusted P value cutoff of 0.05

File Name: Supplementary Data 4

Description: Differentially m<sup>6</sup>A methylated peaks in A549 cells after RSV infection. Differentially m<sup>6</sup>A methylated peaks are identified using count based QNB test.
